# Supplementary material for: Molecular characterization of breast cancer cell lines through multiple omic approaches
Source: PubMed Central journal article supplement (PMC5460504; doi:10.1186/s13058-017-0855-0), 2017-06-05

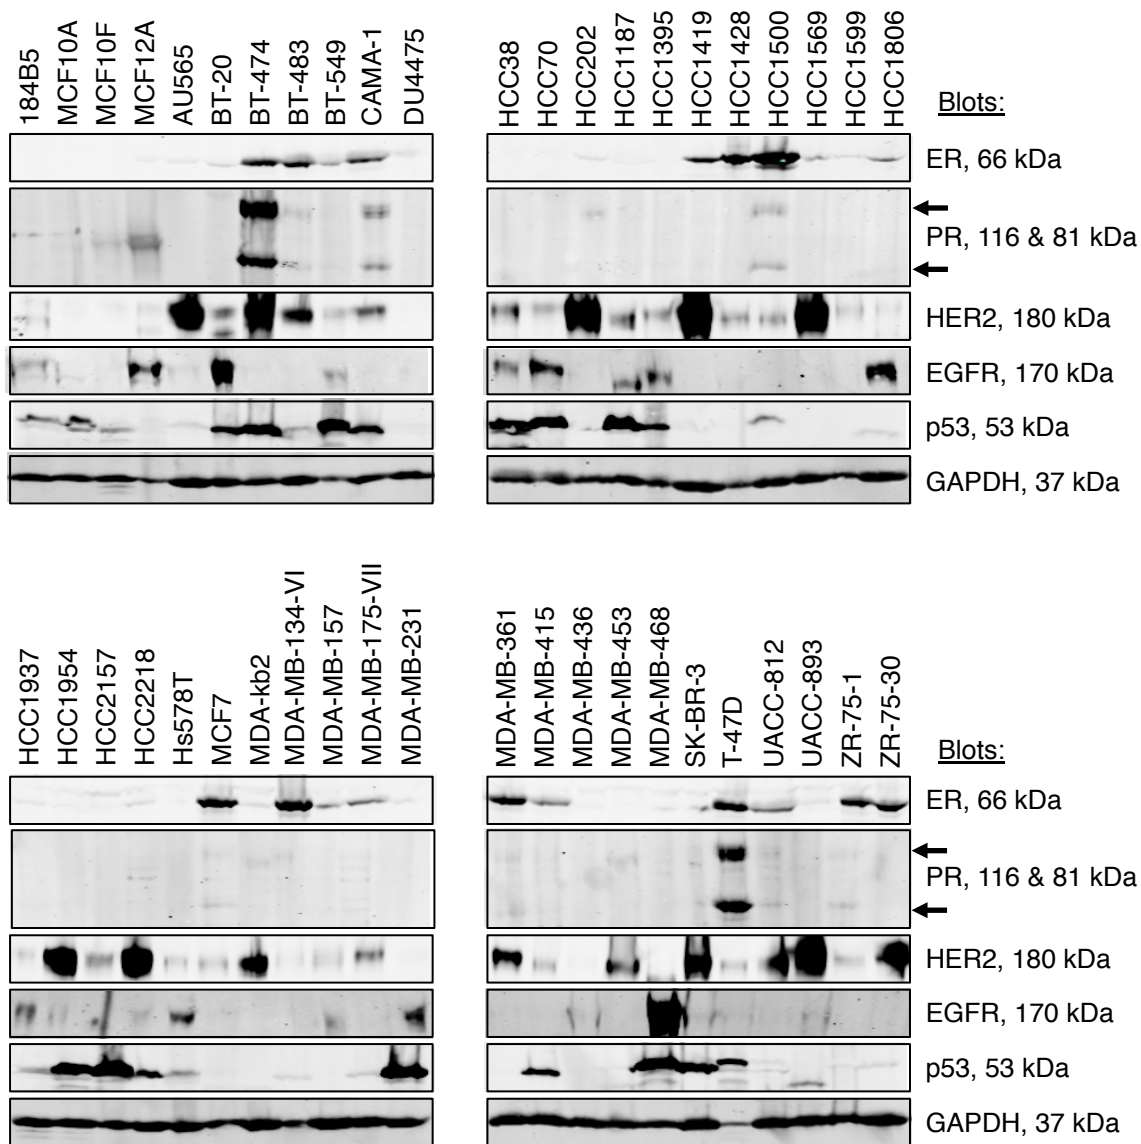

Supplement: 13058_2017_855_MOESM3_ESM.pdf [file 13058_2017_855_MOESM3_ESM.pdf]
