# Supplementary material for: Molecular characterization of breast cancer cell lines through multiple omic approaches
Source: Springer Nature journal article supplement (doi:10.1186/s13058-017-0855-0), 2017-06-05

Additional file 7: Figure S3. Smith *et al.*

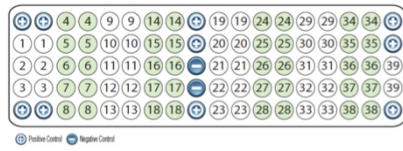

- |           |           |            |                        |                   |
|-----------|-----------|------------|------------------------|-------------------|
| 1. EGFR   | 9. TrkA   | 17. FLT3   | 25. Tyro-3             | 33. c-Abl         |
| 2. HER2   | 10. TrkB  | 18. CSF-1R | 26. Axl                | 34. IRS-1         |
| 3. HER3   | 11. Met   | 19. EphA1  | 27. Tie2               | 35. Zap-70        |
| 4. FGFR1  | 12. Ron   | 20. EphA2  | 28. VEGFR2             | 36. Src           |
| 5. FGFR3  | 13. Ret   | 21. EphA3  | 29. Akt (pT308)        | 37. Lck           |
| 6. FGFR4  | 14. ALK   | 22. EphB1  | 30. Akt (pS473)        | 38. Stat1 (pY701) |
| 7. InsR   | 15. PDGFR | 23. EphB3  | 31. MAPK (pT202,pY204) | 39. Stat3 (pY705) |
| 8. IGF-R1 | 16. c-Kit | 24. EphB4  | 32. S6 (pS235/236)     |                   |

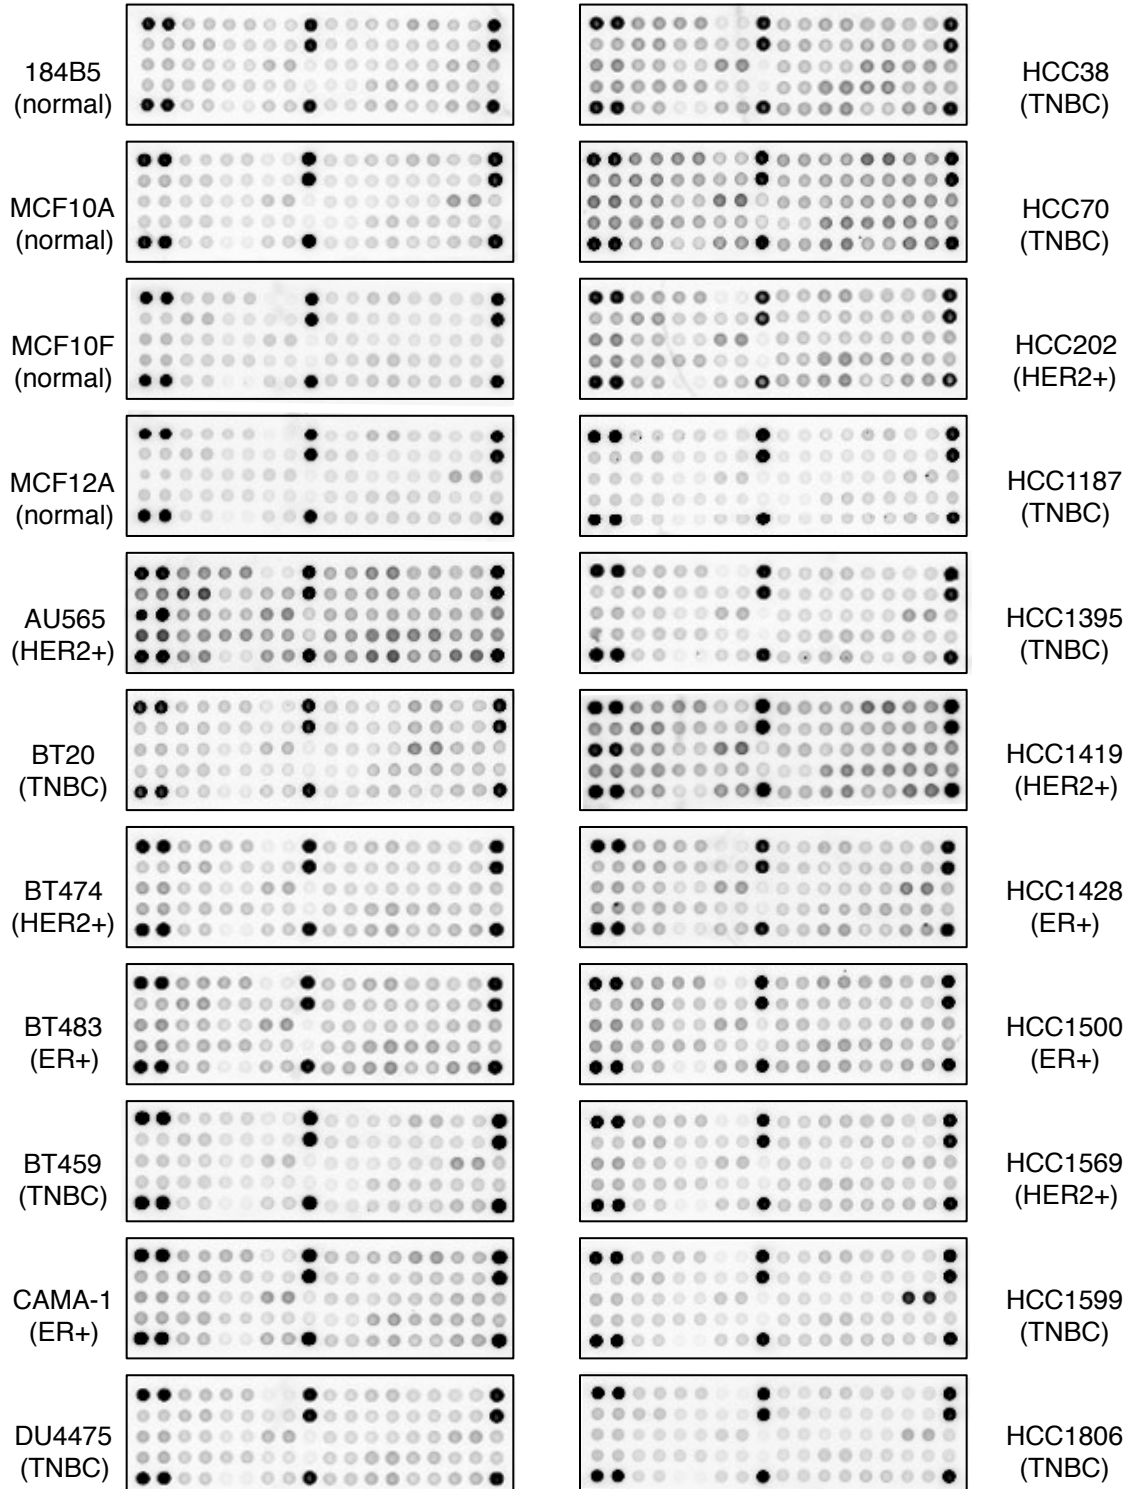

Supplement: 13058_2017_855_MOESM7_ESM.pdf [file 13058_2017_855_MOESM7_ESM.pdf]
